# Supplementary material for: Copper-catalyzed carbonylative Suzuki coupling of aryl iodides with arylboronic acids under ambient pressure of carbon monoxide
Source: Royal Society of Chemistry journal article supplement (doi:10.1039/c4ra08594a), 2014-01-01

## Supporting Information

### Copper-Catalyzed Carbonylative Suzuki Coupling of Aryl iodides with Arylboronic Acids under Ambient Pressure of Carbon Monoxide

Laijin Cheng, Yanzhen Zhong, Zhuchao Ni, Hongyan Du, Fengli Jin, Qi Rong, and Wei Han\*

Jiangsu Collaborative Innovation Center of Biomedical Functional Materials, Jiangsu Key Laboratory of Biofunctional  
Materials, Key Laboratory of Applied Photochemistry, School of Chemistry and Materials Science, Nanjing Normal  
University, Wenyuan Road No.1, 210023 Nanjing (China)

E-mail: whhanwei@gmail.com

### List of Contents

|                                                                                 |    |
|---------------------------------------------------------------------------------|----|
| 1.General Information -----                                                     | S2 |
| 2.General Procedures for Nanocopper- Catalyzed Carbonylative Suzuki Reactions-- | S2 |
| 3. Analytical Data of Products-----                                             | S3 |
| 4. Hg(0) Poisoning Test -----                                                   | S7 |
| -                                                                               |    |
| 5. References -----                                                             | S8 |
| 6. NMR Spectra for Products -----                                               | S9 |

## 1. General Information

**Reagent Information.** All the aryl halides and the arylboronic acids were purchased from Alfa Aesar and Accela ChemBio Co., Ltd. and were used as received. PEG-400 (bought from Acros) was pre-dried (toluene azeotrope) and pre-deoxygenated. The following nanocopper, bases, and *t*BuCOOH were used: nanocopper (99.9%, aladdin; 10-30 nm), K<sub>3</sub>PO<sub>4</sub> (99%, Alfa Aesar), KF (99%, Accela), and *t*BuCOOH (99%, Alfa Aesar).

**Analytical methods.** <sup>1</sup>H and <sup>13</sup>C NMR spectra of solutions in CDCl<sub>3</sub> were recorded on a Bruker Avance 400 instrument. Chemical shifts were expressed in parts per million (ppm) downfield from tetramethylsilane and refer to the solvent signals (CDCl<sub>3</sub> : H 7.24 and C 77.0 ppm). The signals of water were observed at about 1.58 ppm in CDCl<sub>3</sub>, respectively. Abbreviations for signal couplings are: br, broad; s, singlet; d, doublet; t, triplet; m, multiplet; dd, doublet of doublets; dt, triplet of doublets; td, doublet of triplets; tt, triplet of triplets; ddd, doublet of doublet of doublets; tdd, doublet of doublet of triplets. Coupling constants, *J*, were reported in hertz unit (Hz). Infrared spectra of neat substances were recorded on a Thermo Nicolet Corporation GC-FTIR NEXUS670 spectrometer. HRMS was performed on a Bruker's *solarix 94* (ESI-FTICR-MS) mass spectrometer.

## 2. General Procedures for Copper-Catalyzed Carbonylative Suzuki Reactions

*General Procedure A:* A 25 mL Schlenk flask was charged with arylboronic acid (0.75 mmol), nanocopper (0.1 mmol, 6.4 mg), K<sub>3</sub>PO<sub>4</sub> (1.0 mmol, 218.8 mg), *t*BuCOOH (0.25 mmol, 25.8 mg), and PEG-400 (2.0 mL) before standard cycles of evacuation and back-filling with dry and pure carbon monoxide. Corresponding aryl iodide (0.5 mmol) was added successively. The mixture was stirred at 80 °C for the indicated time. At the end of the reaction, the reaction mixture was poured into a saturated aqueous NaCl

solution (15 mL) and extracted with ethyl acetate ( $3 \times 15$  mL). The organic phases were combined, and the volatile components were evaporated in a rotary evaporator. The crude product was purified by column chromatography on silica gel (petroleum ether: diethyl ether = 25 : 1).

In the recycling experiment, the reaction mixture was extracted with ethyl acetate ( $2 \times 15$  mL), and the residue was subjected to a second run by charging it with the same substrates as mentioned above without further addition of  $\text{Pd}(\text{OAc})_2$  and PEG 400 under 1 atm of carbon monoxide. In the third, sixth, and eighth runs, another 0.5 mL of PEG-400 was added to the reaction mixture.

*General Procedure B:* A 25 mL Schlenk flask was charged with arylboronic acid (0.75 mmol), nanocopper (0.1 mmol, 6.4 mg),  $\text{K}_3\text{PO}_4$  (0.5 mmol, 109.4 mg), KF (0.25 mmol, 14.7 mg), *t*BuCOOH (0.25 mmol, 25.8 mg), and PEG-400 (2.0 mL) before standard cycles of evacuation and back-filling with dry and pure carbon monoxide. Corresponding aryl iodide (0.5 mmol) was added successively. The mixture was stirred at 100 °C for the indicated time. At the end of the reaction, the reaction mixture was poured into a saturated aqueous NaCl solution (15 mL) and extracted with ethyl acetate ( $3 \times 15$  mL). The organic phases were combined, and the volatile components were evaporated in a rotary evaporator. The crude product was purified by column chromatography on silica gel (petroleum ether: diethyl ether = 25 : 1).

### 3. Analytical Data of Products

The products, **3aa-3fa**, **3ha-3na**, **3pa-3qa**, **3ab-3ae**, **3ii-3ij**, **3ie**, **3ki-3kj**, **3ke**, and **3kh** were identified by comparison of their spectral data with those of our previous reports.<sup>[S1-S2]</sup>

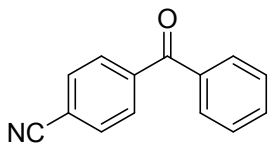

**4-Benzoylbenzonitrile (3ga):** Following *general procedure B*, **3ga** was isolated as a white solid. Known compound; the NMR spectroscopic data agree with those described in ref..<sup>[S3]</sup> <sup>1</sup>H NMR (400 MHz, CDCl<sub>3</sub>): δ 7.85 (d, *J*=8.0 Hz, 2 H), 7.77 (d, *J*=8.0 Hz, 2 H), 7.76-7.75 (m, 2 H), 7.62 (tt, *J*=8.0, 1.2 Hz, 1 H), 7.51-7.47 ppm (m, 2 H); <sup>13</sup>C NMR (100 MHz, CDCl<sub>3</sub>): δ 195.0, 141.2, 136.3, 133.3, 132.1, 130.2, 130.0, 128.6, 117.9, 115.6, 116.6 ppm.

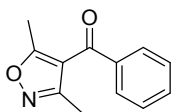

**(3,5-Dimethylisoxazol-4-yl)(phenyl)methanone (3oa):** Following *general procedure B*, **3oa** was isolated as a colorless liquid. Known compound; the NMR spectroscopic data agree with those described in ref..<sup>[S4]</sup> <sup>1</sup>H NMR (400 MHz, CDCl<sub>3</sub>): δ 7.70–7.68 (m, 2 H), 7.59 (tt, *J*=8.0, 1.2 Hz, 1H), 7.50–7.46 (m, 2 H), 2.31 (s, 3 H), 2.28 ppm (s, 3 H); <sup>13</sup>C NMR (100 MHz, CDCl<sub>3</sub>): δ 190.4, 172.3, 159.6, 138.4, 133.2, 128.9, 128.7, 116.4, 13.3, 11.3 ppm.

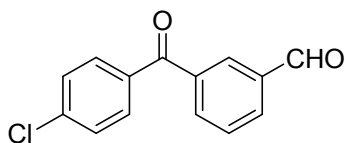

**3-(4'-Chlorobenzoyl)benzaldehyde (3cf) :**Following *general procedure B*, **3cf** was isolated as a white solid. Known compound; the NMR spectroscopic data agree with those described in ref..<sup>[S5]</sup> <sup>1</sup>H NMR (400 MHz, CDCl<sub>3</sub>): δδ 10.07 (s, 1 H), 8.22 (t, *J*=4.0 Hz, 1 H), 8.10 (dt, *J*=8.0, 4.0 Hz, 1 H), 8.03 (dt, *J*=8.0, 4.0 Hz, 1 H), 7.74 (d, *J*=8.0 Hz, 2 H), 7.67 (t, *J*=8.0 Hz, 1 H), 7.47 ppm (d, *J*=8.0 Hz, 2 H); <sup>13</sup>C NMR (100 MHz, CDCl<sub>3</sub>): δ 194.2, 191.2, 139.6, 138.1, 136.4, 135.2, 135.1, 132.9, 131.4, 131.0, 129.4, 128.9 ppm;

mp 93.5-94.3 °C.

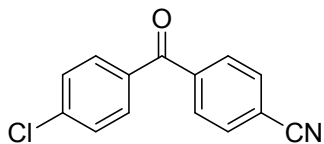

**4-(4-Chlorobenzoyl)benzonitrile (3cg):** Following *general procedure B*, **3cg** was isolated as a white solid. Known compound; the NMR spectroscopic data agree with those described in ref.<sup>[S3]</sup> <sup>1</sup>H NMR (400 MHz, CDCl<sub>3</sub>): δ 7.83 (d, *J*=8.0 Hz, 2 H), 7.78 (d, *J*=8.0 Hz, 2 H), 7.72 (d, *J*=8.0 Hz, 2 H), 7.47 ppm (d, *J*=8.0 Hz, 2 H); <sup>13</sup>C NMR (100 MHz, CDCl<sub>3</sub>): δ 193.8, 140.8, 139.9, 134.6, 132.3, 131.4, 130.1, 129.0, 117.9, 115.9 ppm.

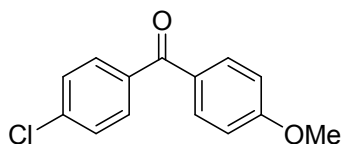

**(4-Chlorophenyl)(4-methoxyphenyl)methanone (3ch):** Following *general procedure B*, **3ch** was isolated as a white solid. Known compound; the NMR spectroscopic data agree with those described in ref.<sup>[S6]</sup> <sup>1</sup>H NMR (400 MHz, CDCl<sub>3</sub>): δ 7.78 (d, *J*=8.0 Hz, 2 H), 7.69 (d, *J*=8.0 Hz, 2 H), 7.43 (d, *J*=8.0 Hz, 2 H), 6.95 (d, *J*=8.0 Hz, 2 H), 3.87 ppm (s, 3 H); <sup>13</sup>C NMR (100 MHz, CDCl<sub>3</sub>): δ 194.3, 163.4, 138.3, 136.6, 132.4, 131.1, 129.8, 128.5, 113.7, 55.5 ppm; mp 123.3-124.0 °C.

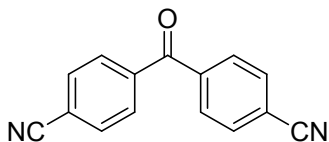

**4,4'-Carbonyldibenzonitrile (3gg):** Following *general procedure A*, **3gg** was isolated as a white solid. Known compound; the NMR spectroscopic data agree with those described in ref.<sup>[S7]</sup> <sup>1</sup>H NMR (400 MHz, CDCl<sub>3</sub>): δ 7.85 (d, *J*=8.0 Hz, 4 H), 7.81 ppm (d, *J*=8.0 Hz, 4 H); <sup>13</sup>C NMR (100 MHz, CDCl<sub>3</sub>): δ 193.4, 139.7, 132.5, 130.2, 117.7, 116.6 ppm.

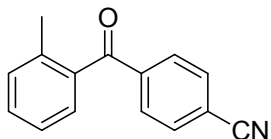

**4-(2-Methylbenzoyl)benzonitrile (3ig):** Following *general procedure B*, **3ig** was isolated as a colorless liquid.  $^1\text{H}$  NMR (400 MHz,  $\text{CDCl}_3$ ):  $\delta$  7.86 (d,  $J=8.0$  Hz, 2 H), 7.74 (d,  $J=8.0$  Hz, 2 H), 7.44–7.40 (m, 1 H), 7.31–7.23 (m, 3 H), 2.34 ppm (s, 3 H);  $^{13}\text{C}$  NMR (100 MHz,  $\text{CDCl}_3$ ):  $\delta$  196.8, 141.1, 137.5, 136.9, 132.3, 131.4, 131.2, 130.3, 128.9, 125.4, 117.9, 116.2, 20.1 ppm.

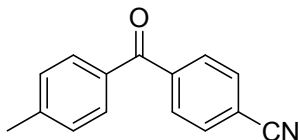

**4-(4-Methylbenzoyl)benzonitrile (3kg):** Following *general procedure B*, **3kg** was isolated as a white solid. Known compound; the NMR spectroscopic data agree with those described in ref.<sup>[S3]</sup>  $^1\text{H}$  NMR (400 MHz,  $\text{CDCl}_3$ ):  $\delta$  7.83 (d,  $J=8.0$  Hz, 2 H), 7.76 (d,  $J=8.0$  Hz, 2 H), 7.67 (d,  $J=8.0$  Hz, 2 H), 7.29 (d,  $J=8.0$  Hz, 2 H), 2.43 ppm (s, 3 H);  $^{13}\text{C}$  NMR (100 MHz,  $\text{CDCl}_3$ ):  $\delta$  196.8, 144.4, 141.6, 133.6, 132.1, 130.3, 130.1, 129.3, 118.0, 115.3, 21.7 ppm.

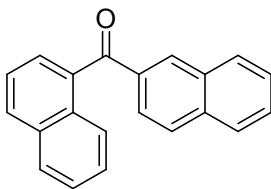

**Naphthalen-1-yl(naphthalen-2-yl)methanone (3nk):** Following *general procedure B*, **3nk** was isolated as a white solid. Known compound; the NMR spectroscopic data agree with those described in ref.<sup>[S8]</sup>  $^1\text{H}$  NMR (400 MHz,  $\text{CDCl}_3$ ):  $\delta$  8.24 (s, 1 H), 8.10 (d,  $J=8.0$  Hz, 1 H), 8.07 (dd,  $J=8.0, 2.0$  Hz, 1 H), 8.03 (d,  $J=8.0$  Hz, 1 H), 7.95–7.92 (m, 2 H), 7.89 (d,  $J=8.0$  Hz, 1 H), 7.82 (d,  $J=8.0$  Hz, 1 H), 7.64 (dd,  $J=8.0, 1.2$  Hz, 1 H), 7.61–7.57 (m, 1 H), 7.55 (d,  $J=8.0$  Hz, 1 H), 7.53 (d,  $J=8.0$  Hz, 1 H), 7.51–7.46 ppm (m, 2 H);  $^{13}\text{C}$

NMR (100 MHz, CDCl<sub>3</sub>):  $\delta$  198.0, 136.6, 135.7, 135.6, 133.7, 132.9, 132.3, 131.2, 131.0, 129.7, 128.7, 128.42, 128.4, 127.8, 127.7, 127.3, 126.8, 126.5, 125.7, 125.4, 124.4 ppm; mp 132.7-133.2 °C.

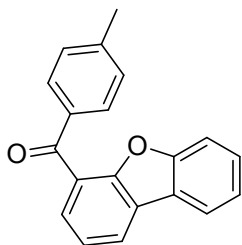

**Dibenzofuran-4-yl(p-tolyl)methanone (3km):** Following *general procedure B*, **3km** was isolated as a white solid. <sup>1</sup>H NMR (400 MHz, CDCl<sub>3</sub>):  $\delta$  8.11 (dd,  $J$ =8.0, 1.2 Hz, 1 H), 7.97 (d,  $J$ =8.0 Hz, 1 H), 7.81 (d,  $J$ =8.0 Hz, 2 H), 7.67 (dd,  $J$ =8.0, 1.2 Hz, 1 H), 7.52 (d,  $J$ =8.0 Hz, 1 H), 7.46-7.39 (m, 2 H), 7.37-7.33 (m, 1 H), 7.26 (d,  $J$ =8.0 Hz, 2 H), 2.43 ppm (s, 3 H); <sup>13</sup>C NMR (100 MHz, CDCl<sub>3</sub>):  $\delta$  193.5, 156.3, 153.7, 144.0, 134.9, 130.4, 129.0, 128.4, 127.7, 125.4, 123.8, 123.5, 123.3, 123.1, 122.4, 120.6, 112.1, 21.7 ppm; IR  $\nu_{\max}$  (KBr)/cm<sup>-1</sup> 3065, 2915, 1657, 1594, 1487, 1449, 1418, 1377, 1292, 1179, 846, 746; HRMS (ESI) calcd. for C<sub>20</sub>H<sub>15</sub>O<sub>2</sub> [M + H] 287.1072, found 287.1065; mp 96.5-97.1 °C.

#### 4. Hg(0) Poisoning Test

As *general procedure B*, a reactions of 4-iodotoluene **1k** (0.5 mmol, 66.3  $\mu$ L), phenylboronic acid **2a** (0.75 mmol, 92.4 mg), nanocopper (0.1 mmol, 6.4 mg), K<sub>3</sub>PO<sub>4</sub> (0.5 mmol, 109.4 mg), KF (0.25 mmol, 14.7 mg), and *t*BuCO<sub>2</sub>H (0.25 mmol, 25.8 mg) in PEG-400 (2.0 mL), with the addition of elemental mercury (20mmol, 4.0 g) (relative to copper) was conducted. Following the reaction for 9 h at 100 °C, the isolated yield of the desired product **3aa** was less than 5%, suggesting that the reaction is inhibited by the introduction of Hg(0).

## 5. References

- [S1] Y. Z. Zhong, W. Han, *Chem. Commun.* **2014**, 50, 3874-3877.
- [S2] Q. Zhou, S. H. Wei, W. Han, *J. Org. Chem.* **2014**, 79, 1454-1460.
- [S3] J. Karthikeyan, K. Parthasarathy, C.-H. Cheng, *Chem. Commun.* **2011**, 47, 10461-10463.
- [S4] R. R. Sauers, L. M. Hadel, A. A. Scimone, T. A. Stevenson, *J. Org. Chem.* **1990**, 55, 4011-4019.
- [S5] Y. Yamazaki, M. Sumikura, Y. Masuda, Y. Hayashi, H. Yasui, Y. Kiso, T. Chinen, T. Usui, F. Yakushiji, B. Potts, S. Neuteboome, M. Palladino, G. K. Lloyd, Y. Hayashi, *Bioorg. Med. Chem.* **2012**, 20, 4279-4289.
- [S6] J. R. Niu, M. M. Liu, P. Wang, Y. Long, M. Xie, R. Li, J. T. Ma, *New J. Chem.* **2014**, 38, 1471-1476.
- [S7] K. Kobayashi, Y. Nishimura, F. X. Gao, K. Gotoh, Y. Nishihara, K. Takagi, *J. Org. Chem.* **2011**, 76, 1949-1952.
- [S8] N. Assadi, S. Pogodin, S. Cohen, I. Agranat, *Struct. Chem.* **2012**, 23, 771-790.

|  |       |
|--|-------|
|  | -7.86 |
|  | -7.84 |
|  | -7.78 |
|  | -7.77 |
|  | -7.76 |
|  | -7.76 |
|  | -7.76 |
|  | -7.75 |
|  | -7.75 |
|  | -7.64 |
|  | -7.64 |
|  | -7.64 |
|  | -7.63 |
|  | -7.62 |
|  | -7.62 |
|  | -7.61 |
|  | -7.60 |
|  | -7.60 |
|  | -7.51 |
|  | -7.51 |
|  | -7.49 |
|  | -7.48 |
|  | -7.47 |
|  | -7.24 |

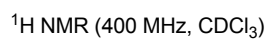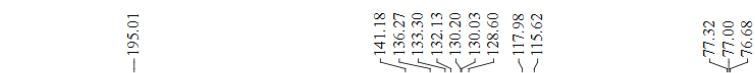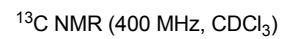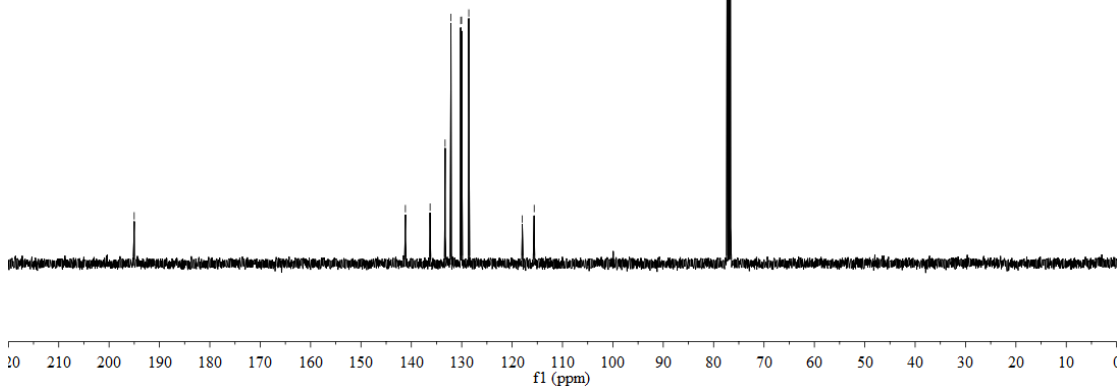

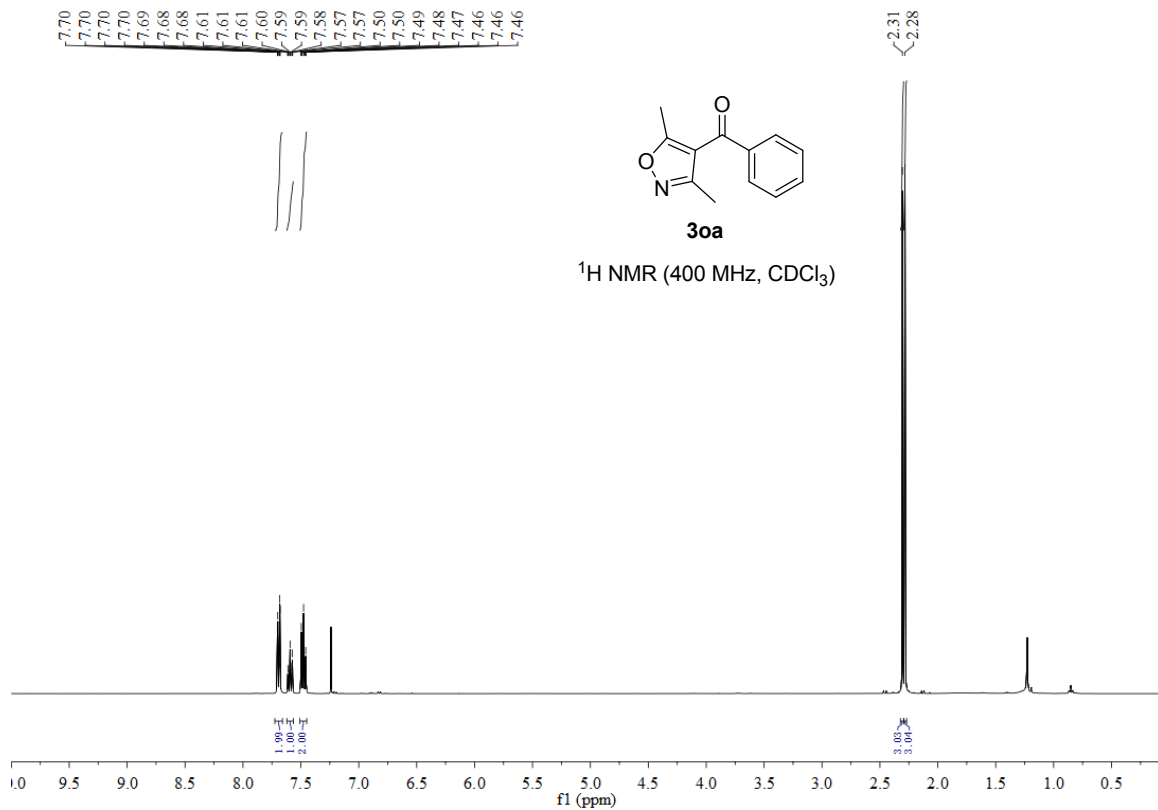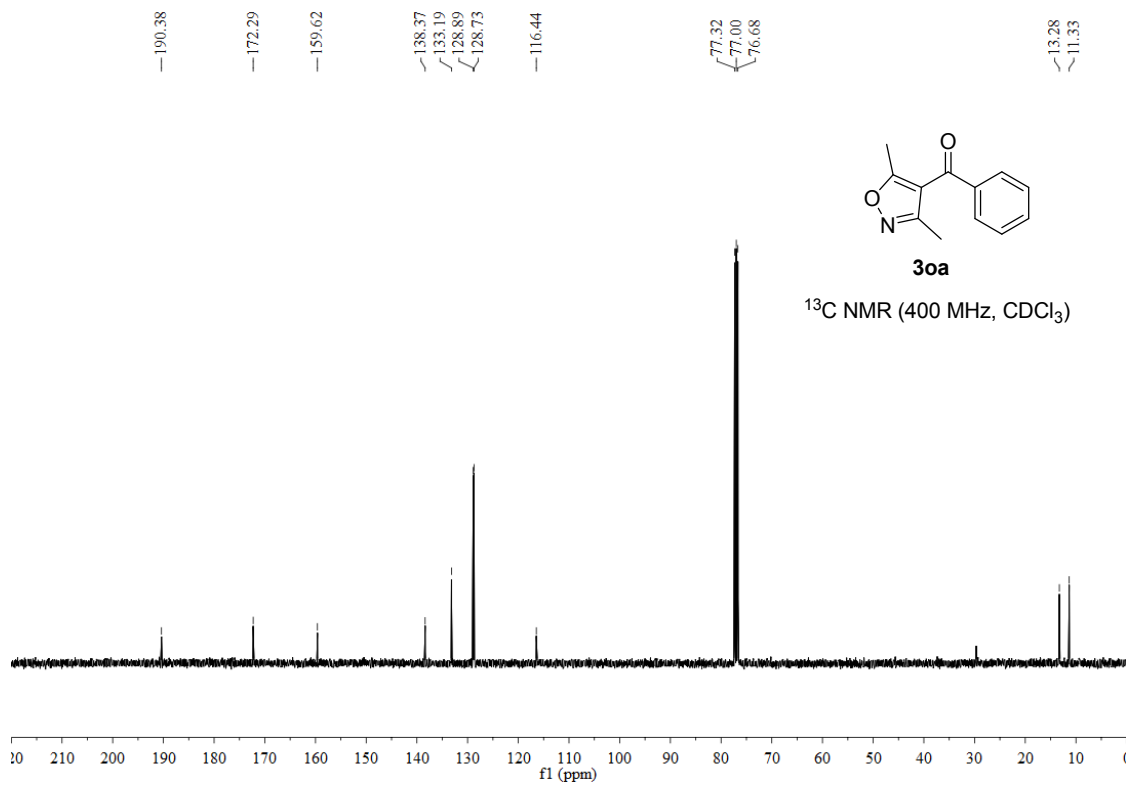

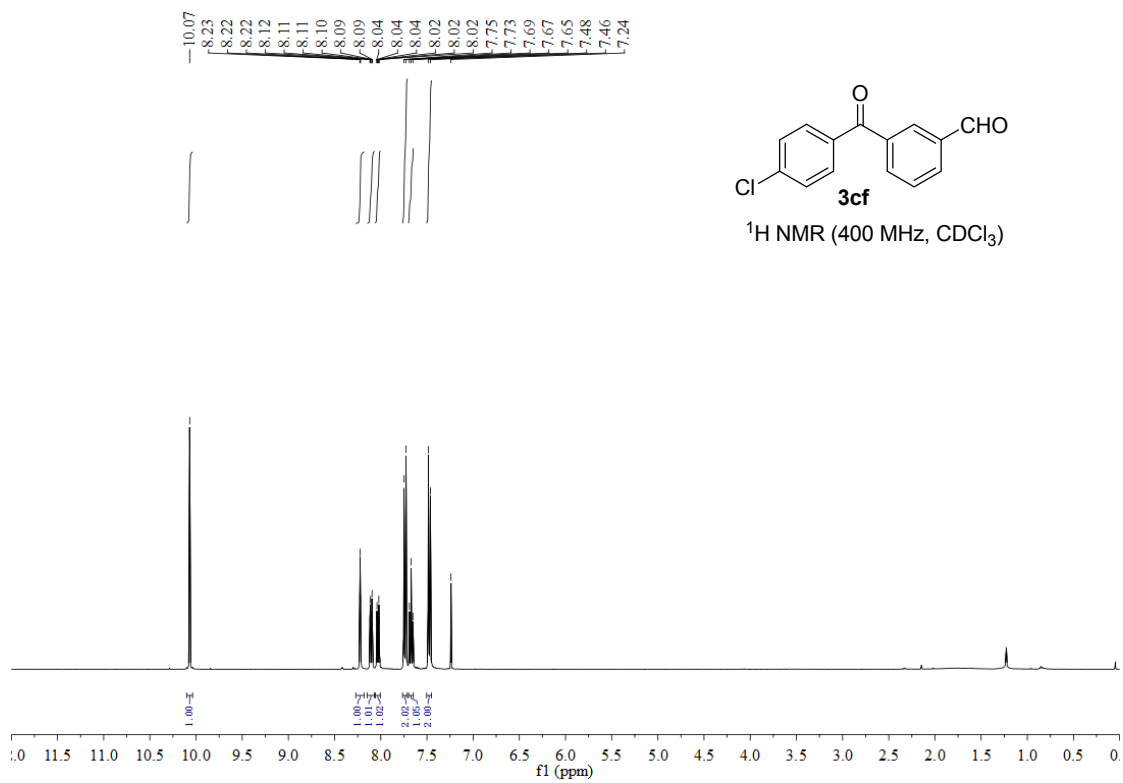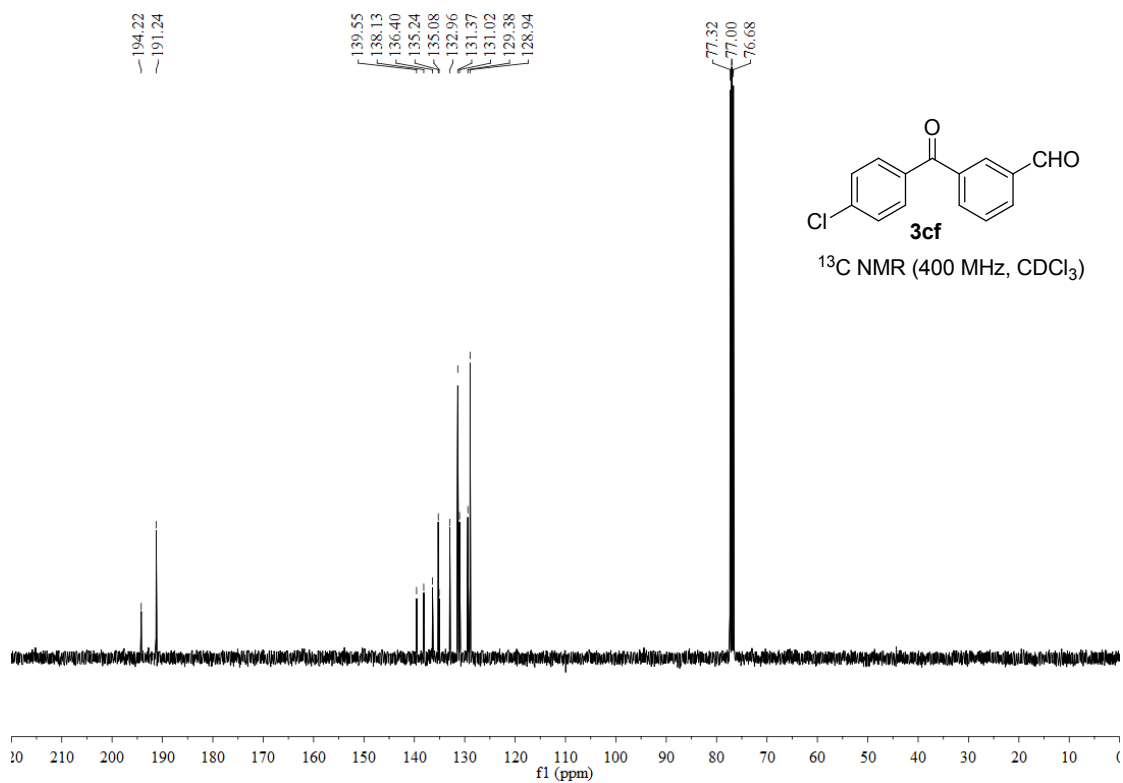

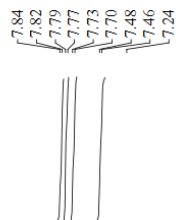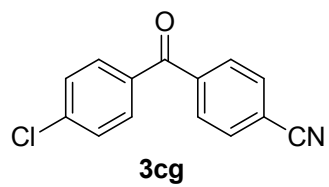

$^1\text{H}$  NMR (400 MHz,  $\text{CDCl}_3$ )

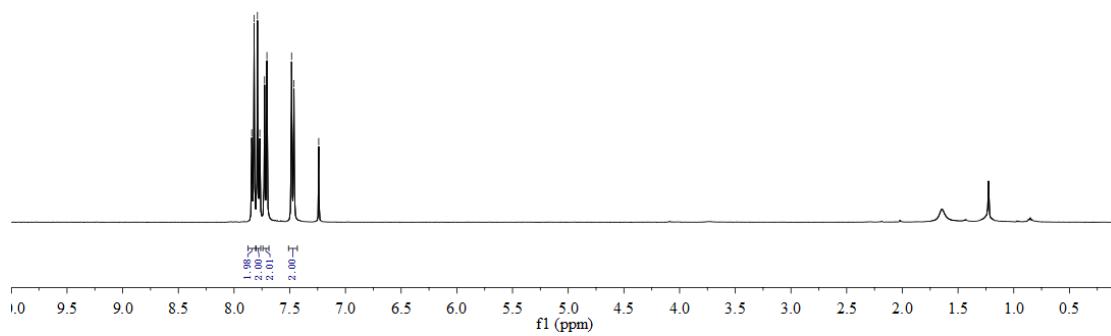

193.80

140.80  
139.94  
134.56  
132.26  
131.40  
130.09  
129.01  
117.86  
115.88

77.32  
77.00  
76.68

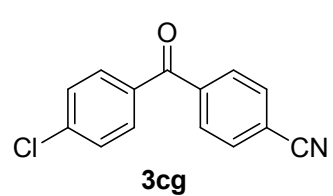

$^{13}\text{C}$  NMR (400 MHz,  $\text{CDCl}_3$ )

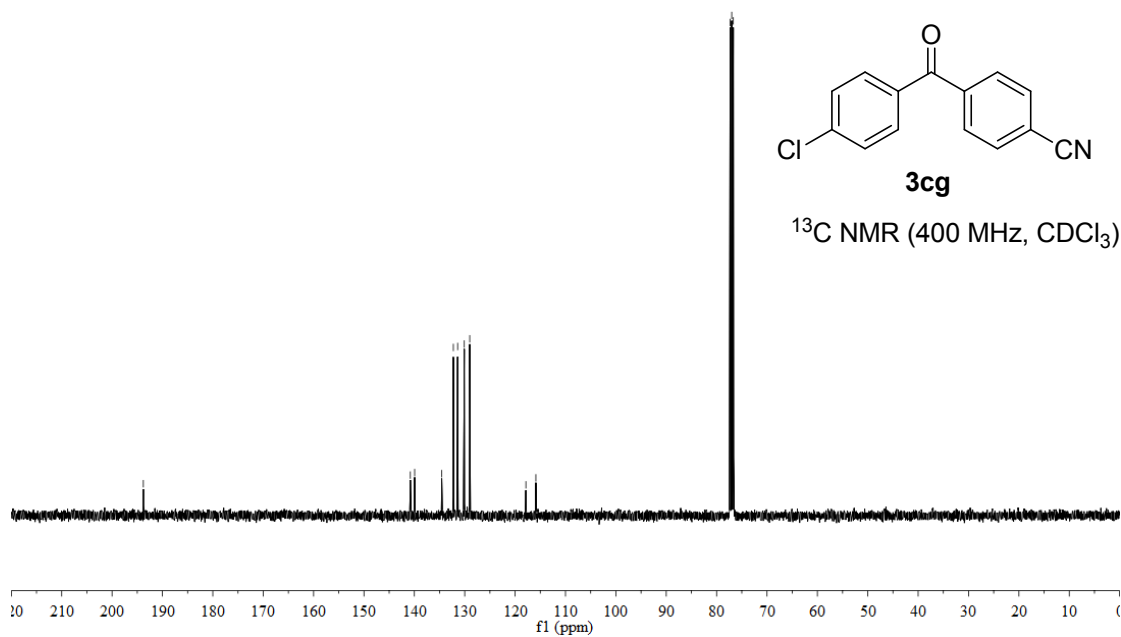

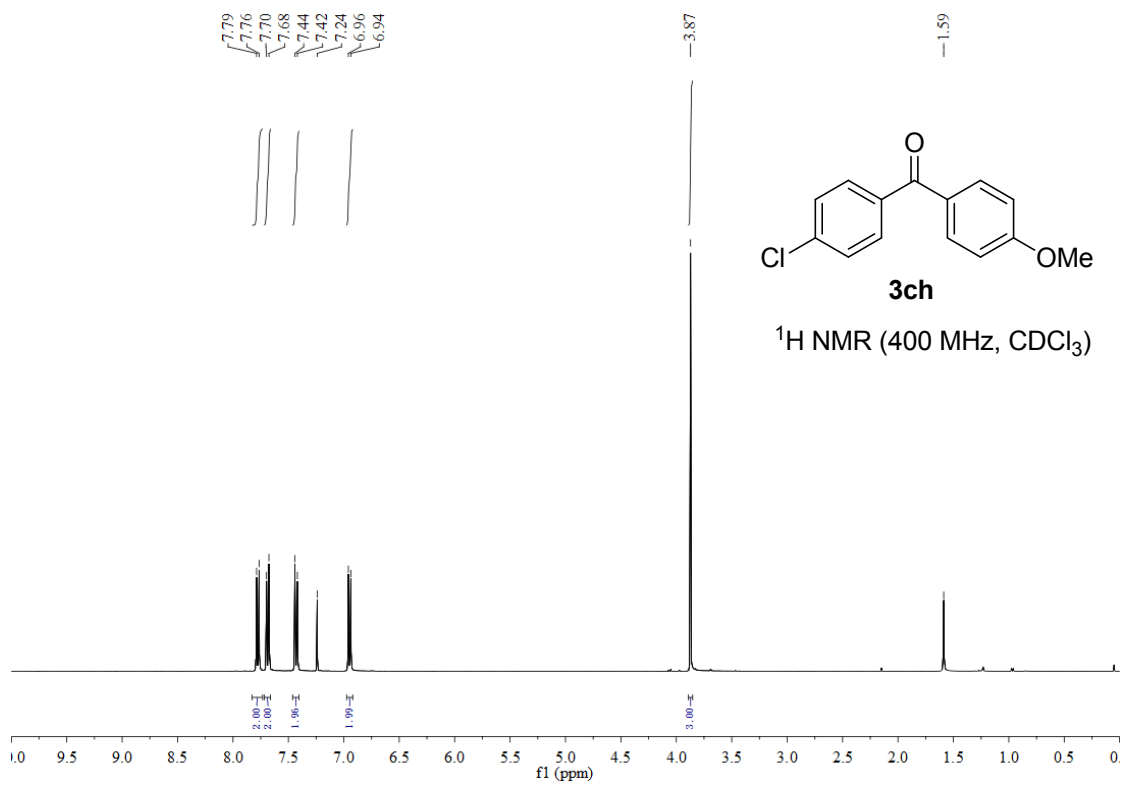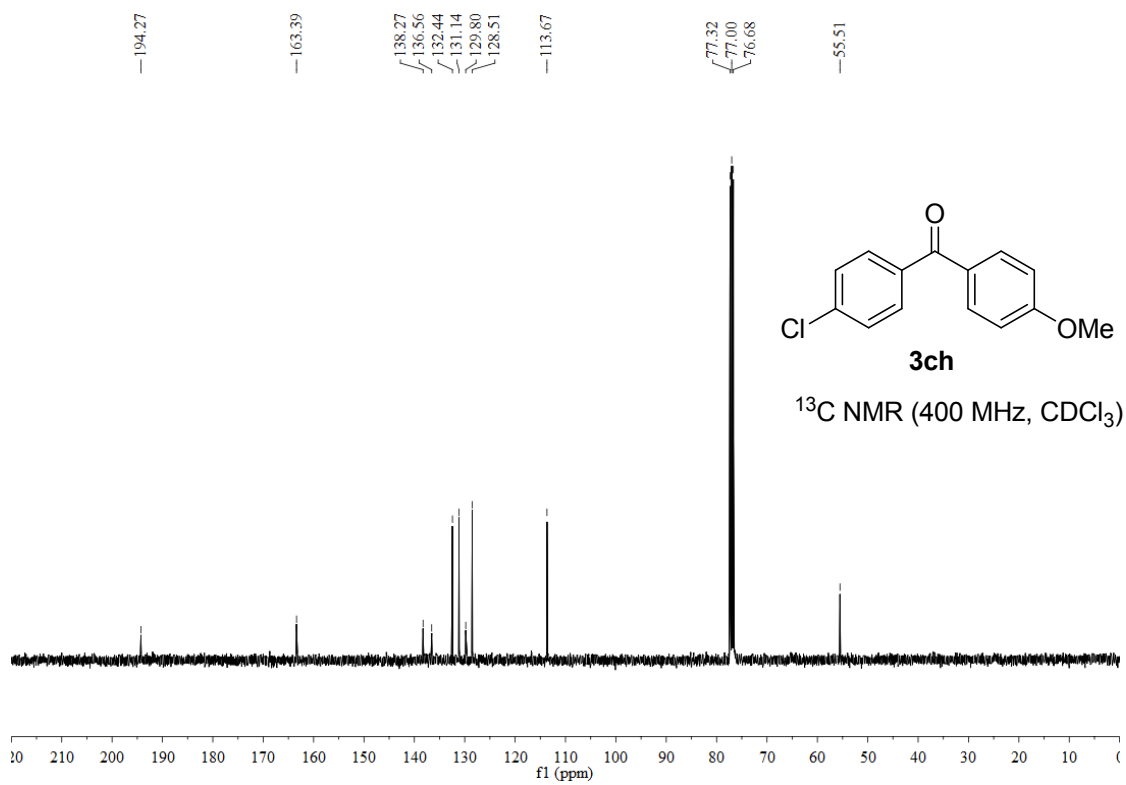

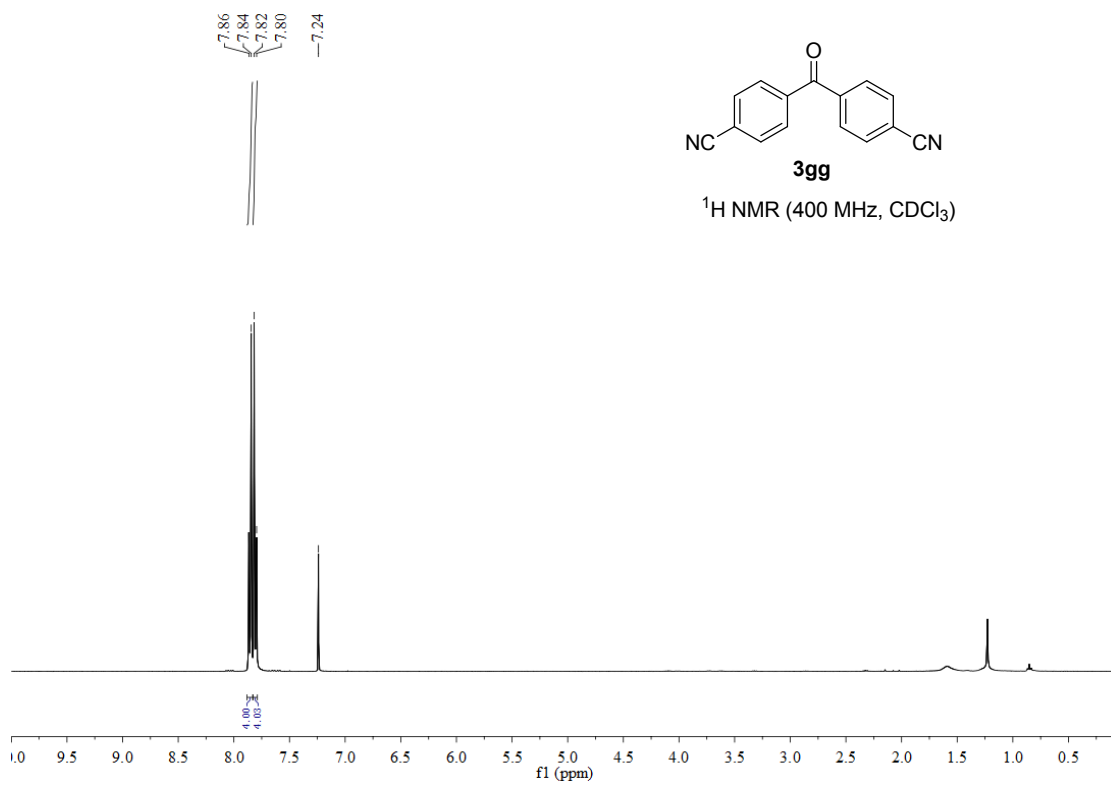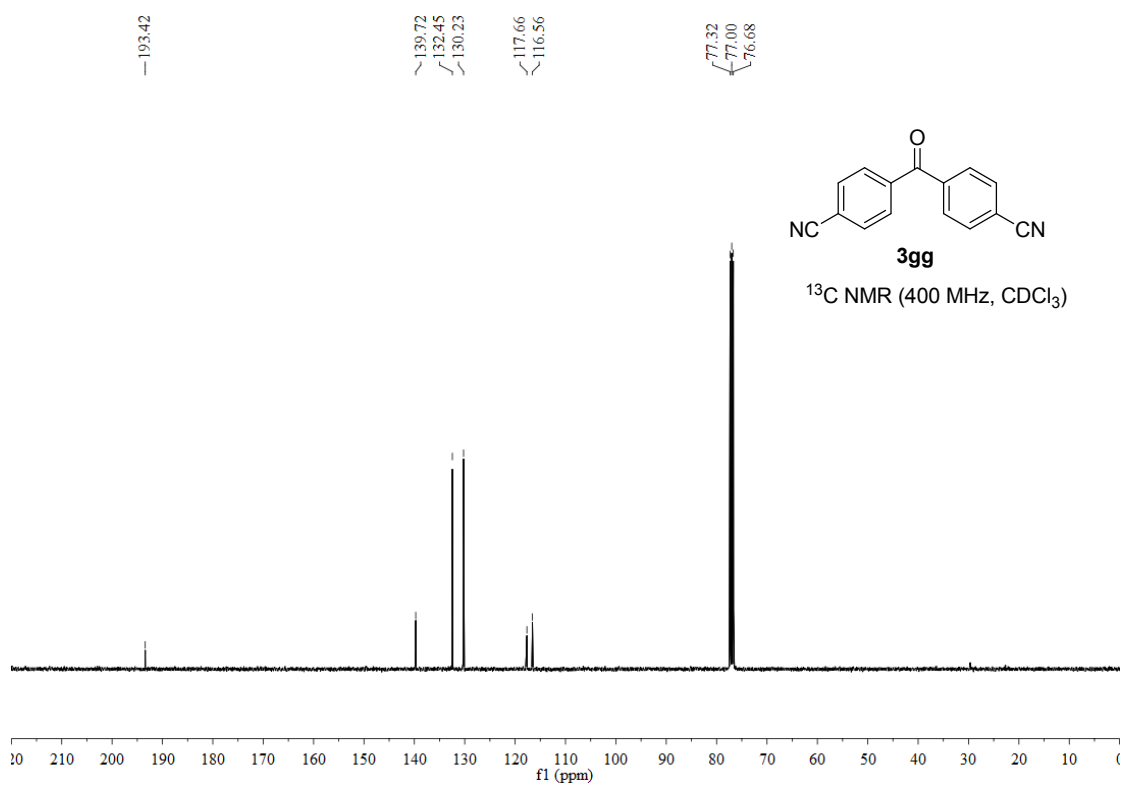

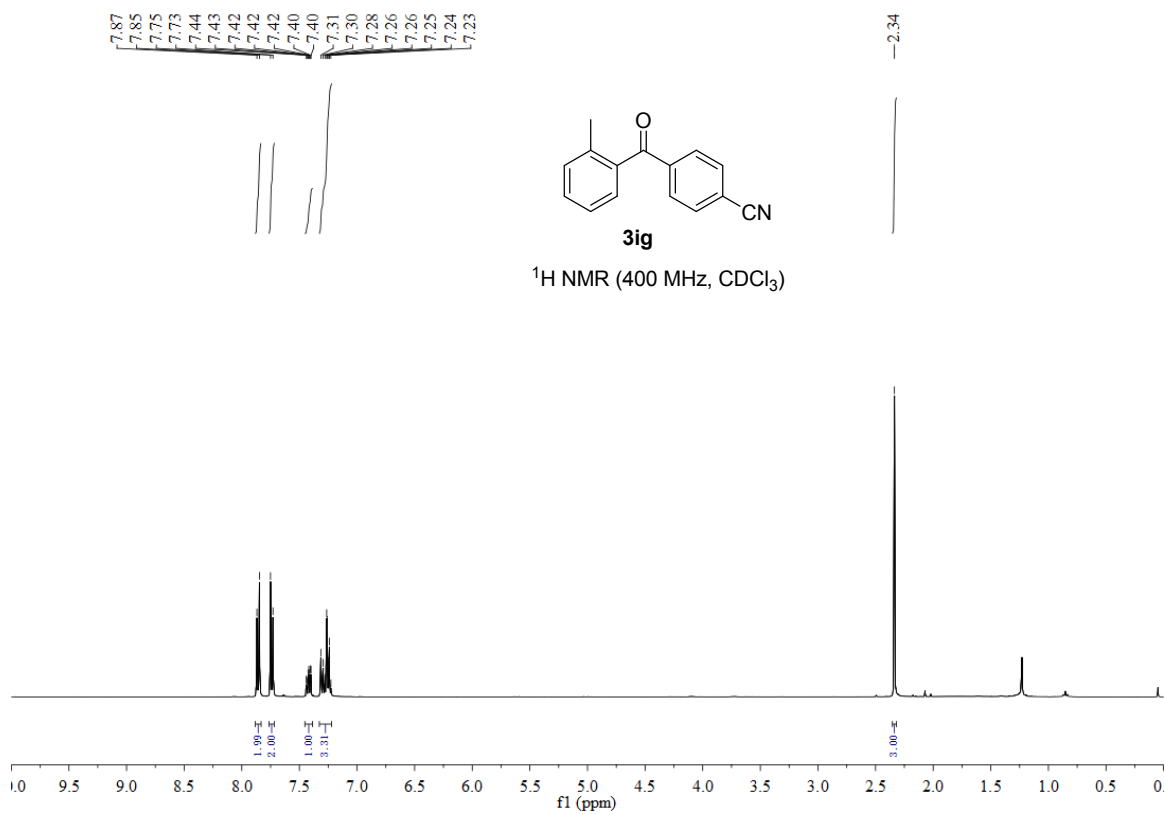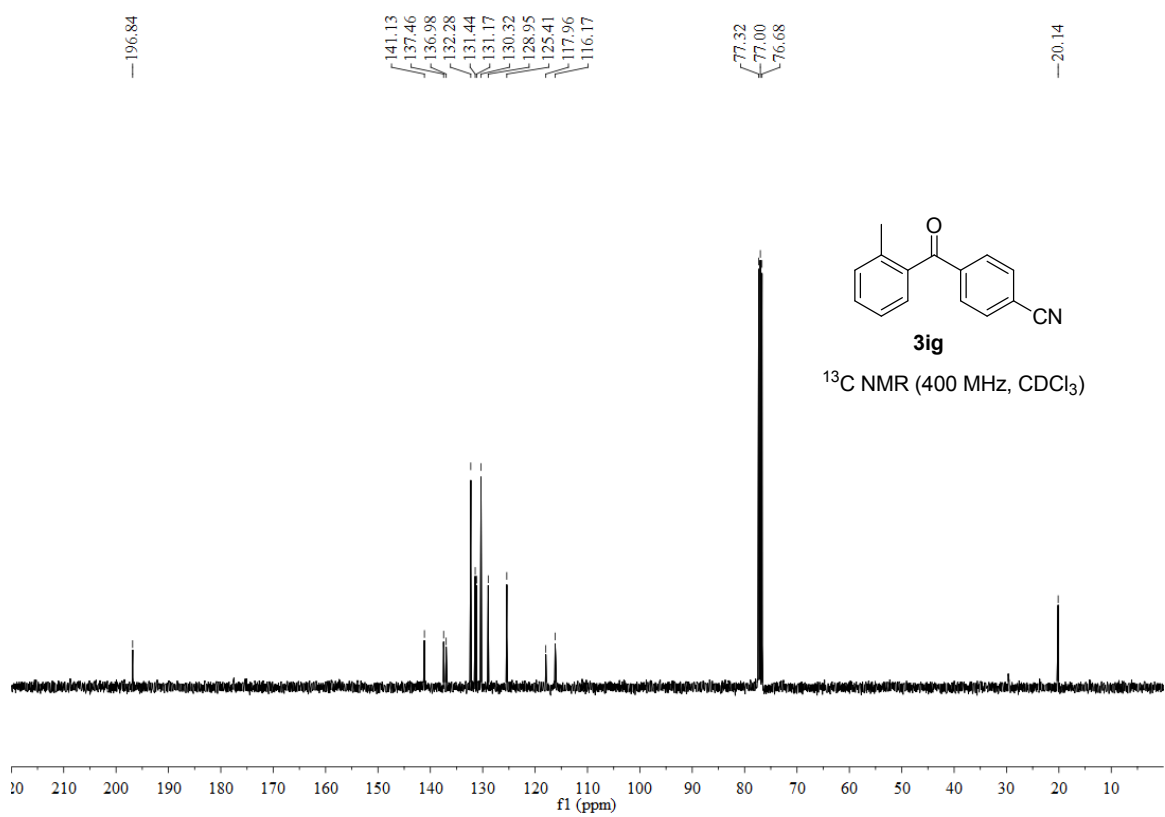

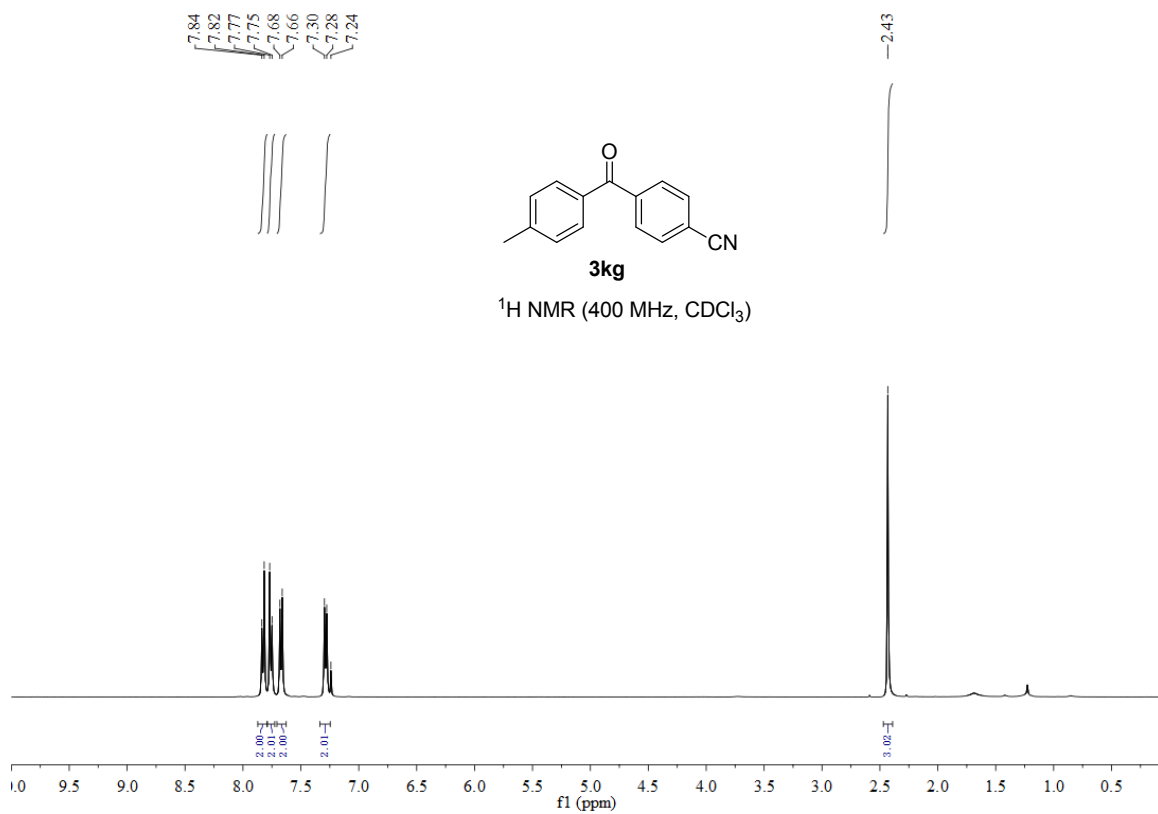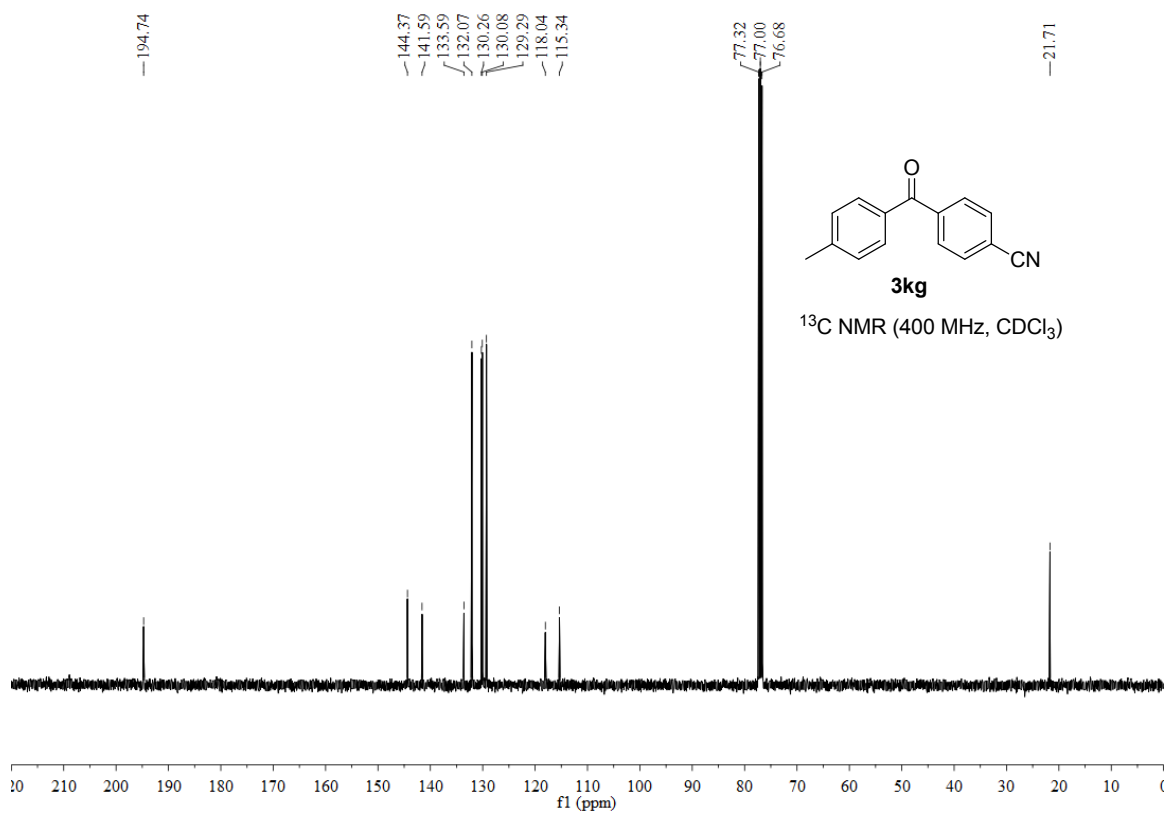

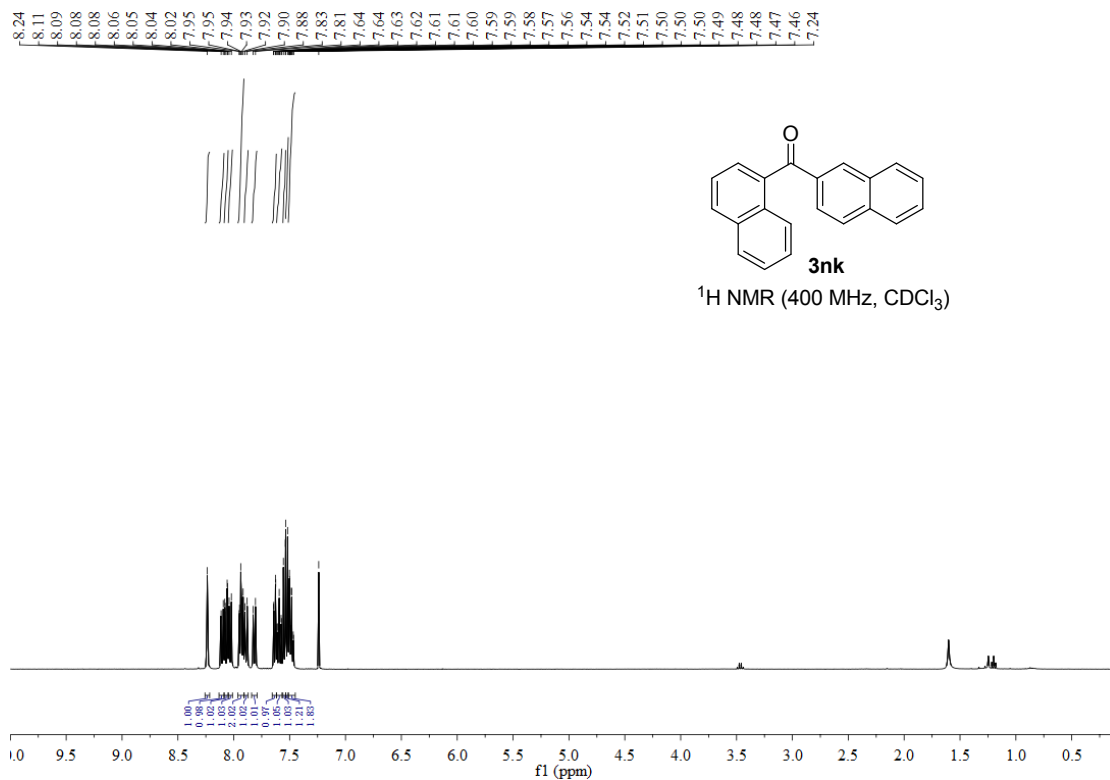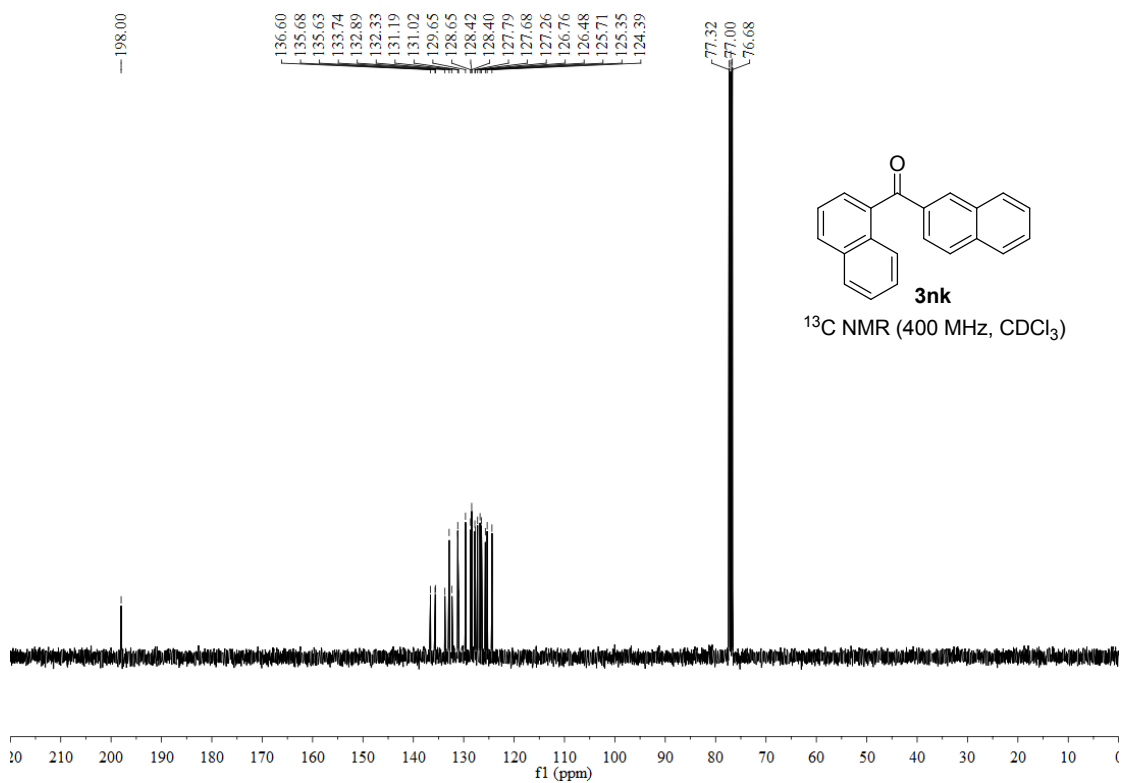

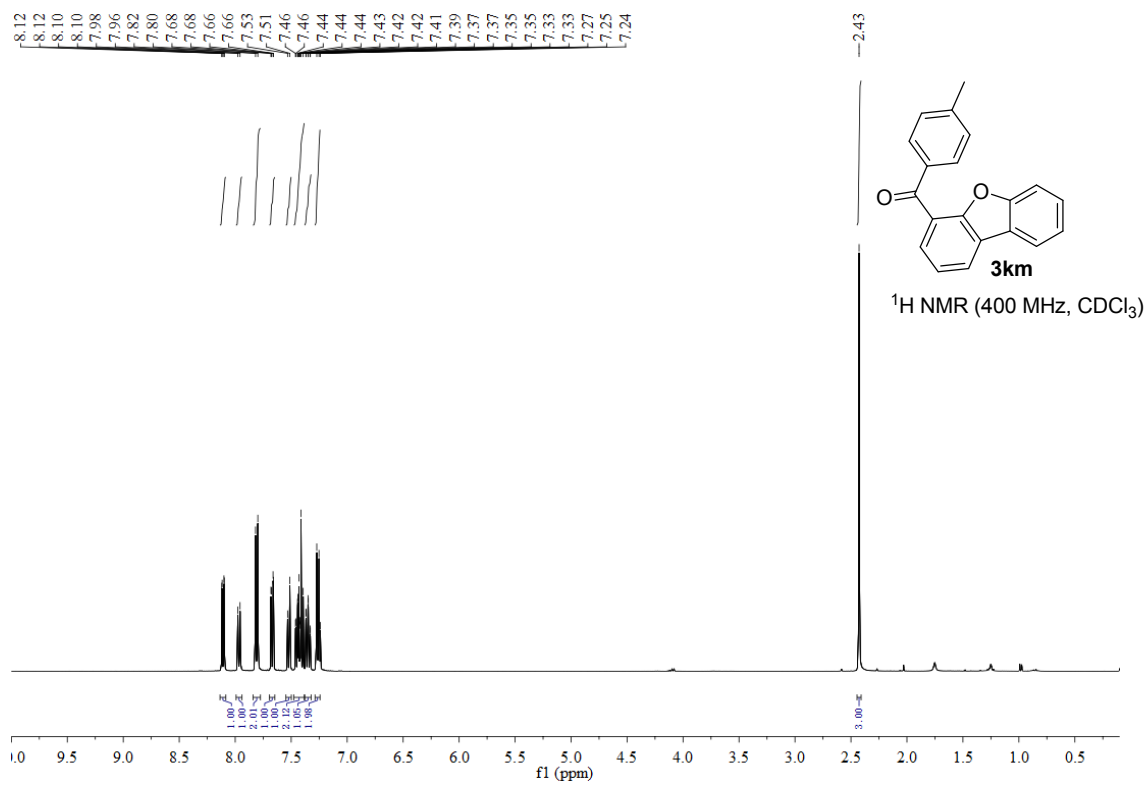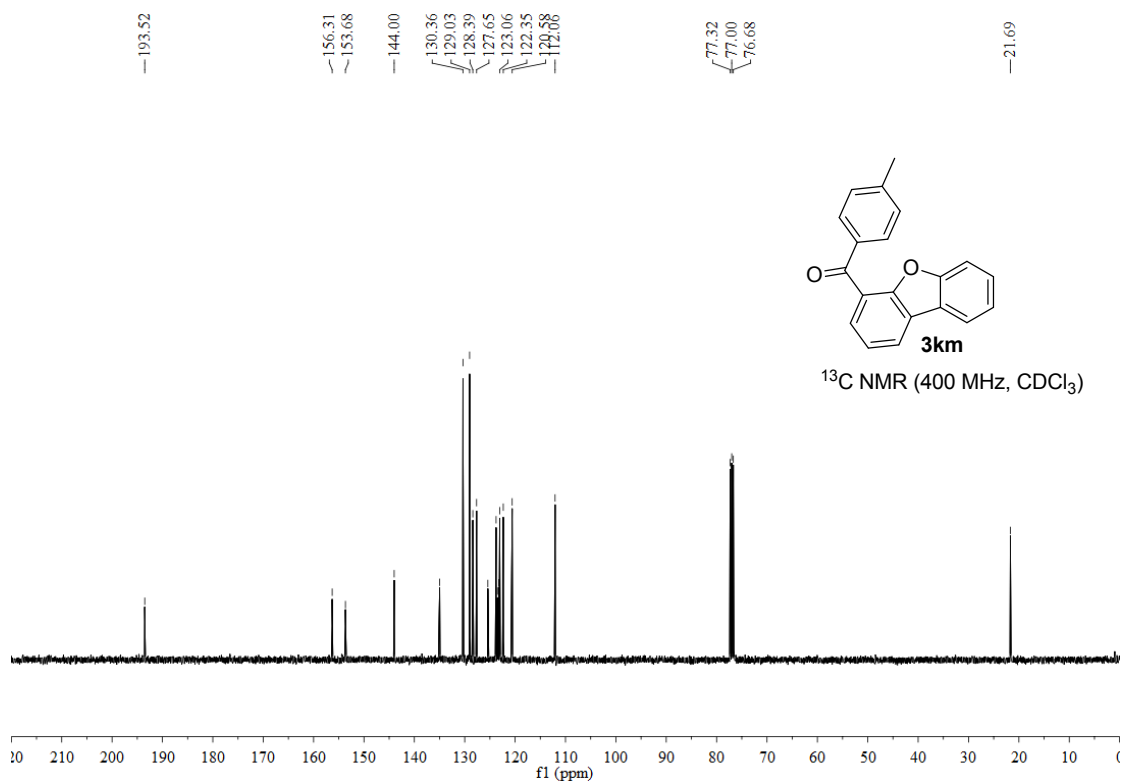

Supplement: c4ra08594a1.pdf [file c4ra08594a1.pdf]
